# Supplementary material
Source: PubMed Central journal article supplement (PMC3535645)
Supplement: 1215689109_pnas.201215689SI.pdf [file 1215689109_pnas.201215689SI.pdf]

# Supporting Information

## Craciun and Balskus 10.1073/pnas.1215689109

### SI Materials and Methods

**General Procedures.** All chemicals were purchased from Sigma-Aldrich, except for  $d_9$ -trimethylamine (TMA) hydrochloride, (CDN Isotopes) and (trimethyl- $d_9$ )-choline chloride (Cambridge Isotope Laboratories). Methanol and water used for liquid chromatography-mass spectrometry (LC-MS) were B&J Brand high-purity solvents (Honeywell Burdick & Jackson).

Oligonucleotide primers were synthesized by Integrated DNA Technologies. Recombinant plasmid DNA was purified with a Qiaprep kit from Qiagen. Gel extraction of DNA fragments and restriction endonuclease cleanup were performed using an Illustra GFX PCR DNA and Gel Band Purification kit from GE Healthcare. DNA sequencing was performed at the GENEWIZ facility, Boston. SDS/PAGE gels were purchased from Bio-Rad.

Optical densities of *Desulfovibrio desulfuricans*, *Desulfovibrio alaskensis*, and *Escherichia coli* cultures were determined with a GENESYS 20 spectrophotometer (Thermo Scientific) by measuring absorbance at 600 nm.

LC-MS analysis was performed on an Agilent 6410 Triple Quadrupole LC/MS instrument (Agilent Technologies), operated in multiple reaction monitoring (MRM) mode. The LC analysis was performed in positive ion mode, using a Bio-Bond (Dikma Technologies) C4 column (5  $\mu$ m, 4.6 mm  $\times$  50 mm), preceded by a C4 precolumn (3.5  $\mu$ m, 2.0 mm  $\times$  20 mm). The mobile phase consisted of a 50/50 water/methanol mixture, supplemented with 5 mM ammonium formate and 0.1% formic acid as solvent modifiers. The flow rate was maintained at 0.3 mL/min for each run. Run time per sample was 6 min, and the first 1.8 min of flow through was sent to waste. The injection volume was 3  $\mu$ L. Blanks consisting of 50/50/0.025 (vol/vol/vol) acetonitrile/water/formic acid were run in between each sample. Samples and blanks were introduced via an electrospray ionization (ESI) source. The capillary voltage was set to 4.0 kV, the fragmentor voltage to 110 V, and the skimmer voltage to 15 V. The drying gas temperature was maintained at 300  $^{\circ}$ C with a flow rate of 10 L/min and a nebulizer pressure of 45 psi. The precursor-product ion pairs used in MRM mode for  $d_9$ -TMA were:  $m/z$  155.1  $\rightarrow$   $m/z$  127.1 [collision energy, (CE = 14 V),  $m/z$  155.1  $\rightarrow$   $m/z$  66.2 (CE = 43 V); and for TMA they were:  $m/z$  146.1  $\rightarrow$   $m/z$  118.1 (CE = 14 V),  $m/z$  146.1  $\rightarrow$   $m/z$  58.1 (CE = 43 V)]. MS1 resolution was set to wide, MS2 resolution was set to unit, the time filter width used was 0.07 min, and the  $\Delta$ EMV (Electron Multiplier Voltage) was 400 V. Data analysis was performed with Mass Hunter Workstation Data Acquisition software (Agilent Technologies). Peak intensities from the transitions indicated in each section, at a retention time of  $\sim$ 2.4 min, were used for the final quantification of TMA or  $d_9$ -TMA. To assess the statistical significance of individual data points, a Student  $t$  test (two-tailed, heteroscedastic) was used to calculate a  $P$  value testing the null hypothesis that the amount of  $d_9$ -TMA is the same in the samples indicated on each graph.

Perpendicular mode X-band electron paramagnetic resonance (EPR) spectra were recorded on a Bruker ElexSysE500 EPR instrument with a 100 K–600 K Digital Temperature Control system, ER 4131VT (Bruker BioSpin), and data acquisition and baseline corrections were performed with Xepr software (Bruker). The magnetic field was calibrated with a standard sample of  $\alpha,\gamma$ -bis(diphenylene)- $\beta$ -phenylallyl (BDPA),  $g = 2.0026$ ; Bruker). The experimental spectra were modeled with EasySpin for Matlab to obtain  $g$  values, hyperfine coupling constants, and line widths (1). EPR spectra represent the average of nine scans and were recorded under nonsaturating conditions: temperature,

120 K; center field, 3,360 Gauss; range, 150 Gauss; microwave power, 63.25  $\mu$ W; microwave frequency, 9.433602 GHz (choline fermentation media), 9.436572 GHz (pyruvate fermentation media); modulation amplitude, 0.1 mT; modulation frequency, 100 kHz; time constant, 40.96 ms; conversion time, 163.84 ms; and scan time, 167.77 s.

### Growth of *D. desulfuricans* ATCC 27774 on Various Carbon Sources and Quantitation of TMA Production from Choline. *D. desulfuricans* ATCC 27774 was obtained from João Nuno Carita (Universidade Nova de Lisboa, Lisbon).

Lactate-sulfate (LS) medium was used for routine cultivation and was prepared as previously described (2). All concentration values indicated correspond to final values. LS medium contains sodium lactate (60 mM, 1.2% wt/vol), sodium sulfate (50 mM), magnesium sulfate (8 mM), ammonium chloride (5 mM), HEPES pH 7.2 (25 mM), calcium chloride (0.6 mM), yeast extract (Becton, Dickinson and Company) (0.1%), trace mineral solution [nitrilotriacetic acid trisodium salt (0.62 mM), iron (II) sulfate heptahydrate (19  $\mu$ M), manganese (II) chloride tetrahydrate (6.3  $\mu$ M), cobalt (II) chloride hexahydrate (8.9  $\mu$ M), copper (II) chloride dihydrate (1.5  $\mu$ M), zinc (II) sulfate heptahydrate (9.1  $\mu$ M), sodium molybdate dihydrate (0.5  $\mu$ M), and sodium selenate (1.0  $\mu$ M)], vitamin solution (3) [pyridoxine hydrochloride (96 nM), thiamine hydrochloride (30 nM), riboflavin (27 nM), calcium pantothenate (42 nM), lipoic acid (48 nM),  $p$ -aminobenzoic acid (73 nM), nicotinic acid (81 nM), vitamin B<sub>12</sub> (7 nM), biotin (16 nM), folic acid (9 nM), and mercaptoethanesulfonic acid (141 nM)], and resazurin (2.5  $\mu$ M). The pH of the medium was adjusted to 7.2. The medium was autoclaved for 5 min, sparged for 30 min with argon, dispensed into 18  $\times$  150 mm modified Hungate tubes (Chemglass Life Sciences; CLS-4209-10) and capped with butyl rubber stoppers and aluminum seals (10 mL media per tube). The tubes were autoclaved for an additional 20 min. After cooling, anaerobic and sterile aqueous solutions of potassium phosphate dibasic (2.2 mM), sodium bicarbonate (8 mM), and cysteine-HCl (0.04%) were added. Tubes of anaerobic media were stored under a headspace of argon.

Lactate fermentation media (L) was prepared in a similar manner to the LS media except that sodium sulfate was replaced with sodium chloride (100 mM) and magnesium sulfate was replaced with magnesium chloride (8 mM). Choline-sulfate (CS) and choline fermentation (C) media were prepared in a similar manner to the LS and L media, except that it was supplemented with 0.01 mg/mL iron (III) ammonium citrate, and sodium lactate was replaced by choline chloride (60 mM), which was added as an anaerobic, filter-sterilized aqueous solution shortly before inoculation. Ethanolamine- and pyruvate-containing media [ethanolamine-sulfate (ES), ethanolamine fermentation (E), pyruvate-sulfate (PS), and pyruvate fermentation (P)] were prepared like CS and C media, except that choline was replaced with ethanolamine hydrochloride (60 mM) or sodium pyruvate (60 mM).

For each media type, two 18  $\times$  150 mm modified Hungate tubes containing 10 mL of medium and N<sub>2</sub> in the headspace were inoculated with 0.1 mL of an overnight LS starter culture (OD<sub>600</sub> = 0.85) and incubated at 37  $^{\circ}$ C. OD<sub>600</sub> was measured periodically until the cultures reached stationary phase. Growth was observed on LS, CS, C, PS, and P media (Fig. S14).

To confirm and quantify TMA formation during growth on choline, *D. desulfuricans* ATCC 27774 was grown on CS and C media containing (trimethyl- $d_9$ )-choline (60 mM). This growth substrate was added as an anaerobic, filter-sterilized aqueous

solution shortly before inoculation. Four 10 mL replicates for each media type (CS, and C) were inoculated with 0.1 mL of an overnight LS starter culture ( $OD_{600} = 0.85$ ) and grown at 37 °C until reaching stationary phase (2–3 d). The concentration of d<sub>9</sub>-TMA in culture media (Fig. S1B) was determined using LC-MS after derivatization with ethyl bromoacetate using a published procedure (4). Briefly, to a 10-mL glass vial sealed with a 13 × 20 mm sleeve stopper (VWR) was added 100 µL of bacterial culture filtered through a 13-mm, 0.22-µm pore-size Acrodisc syringe filter with HT Tuffryn Membrane (Pall Life Sciences), 100 µL of TMA (43.3 mM in water), 10 µL of concentrated ammonia (7 M in methanol), and 120 µL of ethyl bromoacetate (20 mg/mL in acetonitrile). This mixture was incubated at room temperature for 30 min and then quenched by adding 4 mL of infusion solution [acetonitrile/water/formic acid, 50/50/0.025 (vol/vol/vol)]. A 0.5-µL aliquot of the resulting mixture was further diluted 2,000-fold with infusion solution and analyzed by LC-MS (3 µL injection volume) using the parameters described in *SI Materials and Methods, General Procedures*. The transitions used for quantitation were  $m/z$  155.1 → 127.1 for d<sub>9</sub>-TMA and  $m/z$  146.1 → 118.1 for TMA. Media blanks consisted of 10 mL of uninoculated CS and C media containing (trimethyl-d<sub>9</sub>)-choline (60 mM). Four tubes per type of media were incubated at 37 °C alongside the bacterial cultures until the cultures reached stationary phase.

#### Cloning CutC (Dde\_3282) and CutD (Dde\_3281) from *D. alaskensis* G20.

Genomic DNA from *D. alaskensis* G20 was isolated from a 10-mL LS culture using the UltraClean Microbial DNA Isolation kit from MoBio Laboratories. The sequences of primers used for amplification of *cutC* (Dde\_3282) and *cutD* (Dde\_3281) genes are provided in Table S5. Primers were designed to amplify both of the individual genes as well as the 3529-bp region (3270700–3274229) encoding both CutC and CutD. CutC was PCR amplified from genomic DNA using forward primer Dde-3282-NdeI-start and reverse primer Dde-3282-XhoI-nostop. All PCR reactions (set up in triplicate) contained 25 µL of PfuTurbo Hotstart master mix (Stratagene), 2 µL of genomic DNA template, and 100 pmol of each primer in a total volume of 50 µL. Thermocycling was carried out in a C1000 Gradient Cycler (Bio-Rad) using the following parameters: denaturation for 1 min at 95 °C, followed by 40 cycles of 30 s at 95 °C, 1 min at 68.4 °C, 5 min at 70 °C, and a final extension time of 10 min at 70 °C. PCR reactions were analyzed by agarose gel electrophoresis with ethidium bromide staining, pooled, and purified. Identical conditions were used to amplify CutD (forward primer Dde-3281-NdeI-start + reverse primer Dde-3281-XhoI-stop) as well as CutC + CutD (forward primer Dde-3282-NdeI-start + reverse primer Dde-3281-XhoI-stop).

Amplified fragments were digested with NdeI and XhoI (New England Biolabs, NEB) for 2.5 h at 37 °C. Digests contained 1 µL of water, 3 µL of NEB buffer 4 (10×), 3 µL of BSA (10×), 20 µL of PCR product, 1.5 µL of NdeI (20 units/µL), and 1.5 µL of

XhoI (20 units/µL). Restriction digests were purified directly using agarose gel electrophoresis and the gel fragments were further purified using the Illustra GFX kit. The digests were ligated into linearized expression vectors using T4 DNA ligase (NEB). The CutC + CutD and CutD digests were ligated into linearized pET-29b(+) to encode untagged and C-terminal His<sub>6</sub>-tagged constructs, respectively, whereas the CutC digest was ligated into linearized pET-28a(+) to encode an N-terminal His<sub>6</sub>-tagged construct. Ligations were incubated at 16 °C for 24 h and contained 3.5 µL water, 1 µL T4 ligase buffer (10×), 0.5 µL digested vector, 3 µL digested insert DNA, and 2 µL T4 DNA ligase (400 units/µL). A total of 5 µL of each ligation was used to transform a single tube of chemically competent *E. coli* TOP10 cells (Invitrogen). The identities of the resulting pET-29b-CutC/CutD, pET-29b-CutD, and pET-28a-CutC constructs were confirmed by sequencing purified plasmid DNA. These constructs were transformed into chemically competent *E. coli* BL21 (DE3) cells (Invitrogen) and stored at –80 °C as frozen LB/glycerol stocks.

**Construction of CutC (Dde\_3282) C489A and G821A Mutants.** The C489A and G821A mutants of CutC (Dde\_3282) were constructed separately in pET-29b-CutC/CutD using site-directed mutagenesis. The CutC (Ddes\_1357) homology model identified these amino acid positions (which correspond to C491 and G823 in Ddes\_1357 and are conserved in all glycol radical enzymes) as sites of the thiyl and glycol radicals involved in catalysis (5). The sequences of primers used for mutagenesis are found in Table S5. The C489A mutant was constructed via PCR amplification of pET-29b-CutC/CutD using forward primer Dde3282-QC-C489A-for and reverse primer Dde3282-QC-C489A-rev. The G821A mutant was constructed via PCR amplification of pET-29b-CutC/CutD using forward primer Dde3282-QC-G821A-for and reverse primer Dde3282-QC-G821A-rev.

PCR reactions contained 36 µL of PfuTurbo DNA polymerase (2.5 units/µL; Stratagene), 5 µL of Pfu DNA polymerase reaction buffer (10×), 1 µL of 10 mM dNTP Mix (Bio-Rad), 50 ng DNA template, and 125 ng of each forward and reverse primer in a total volume of 50 µL. Thermocycling was carried out using the following parameters: denaturation for 30 s at 95 °C, followed by 18 cycles of 30 s at 95 °C, 5 min at 55 °C, and 9 min at 68 °C. Upon cooling to room temperature, 1 µL of DpnI (NEB) was added to each tube, and the resulting mixtures were incubated at 37 °C. After 1 h, an additional 1 µL of DpnI was added to each tube and incubation continued for an additional hour at 37 °C. A total of 5 µL of each digestion was used to transform a single tube of chemically competent *E. coli* TOP10 cells. The identity of the resulting pET-29b-CutC/CutD-C489A or -G821A constructs was confirmed by sequencing purified plasmid DNA. Chemically competent *E. coli* BL21(DE3) cells were transformed with pure pET-29b-CutC/CutD-C489A or -G821A plasmid DNA and stored at –80 °C as frozen LB/glycerol stocks.

1. Stoll S, Schweiger A (2006) EasySpin, a comprehensive software package for spectral simulation and analysis in EPR. *J Magn Reson* 178(1):42–55.
2. Krumholz LR, Bryant MP (1986) *Eubacterium oxidoreducens* sp. nov. requiring H<sub>2</sub> or formate to degrade gallate, pyrogallol, phloroglucinol, and quercetin. *Arch Microbiol* 144:8–14.
3. Steger JL, Vincent C, Ballard JD, Krumholz LR (2002) *Desulfovibrio* sp. genes involved in the respiration of sulfate during metabolism of hydrogen and lactate. *Appl Environ Microbiol* 68(4):1932–1937.

4. Johnson DW (2008) A flow injection electrospray ionization tandem mass spectrometric method for the simultaneous measurement of trimethylamine and trimethylamine *N*-oxide in urine. *J Mass Spectrom* 43(4):495–499.
5. Lehtiö L, Goldman A (2004) The pyruvate formate lyase family: Sequences, structures and activation. *Protein Eng Des Sel* 17(6):545–552.

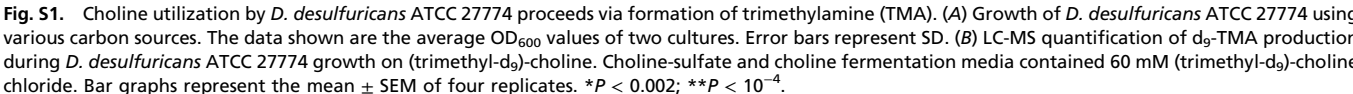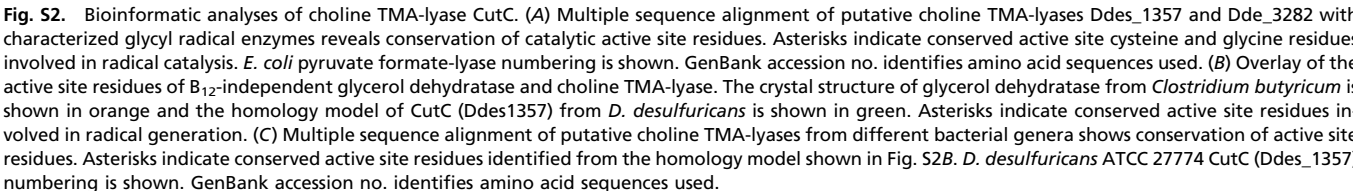

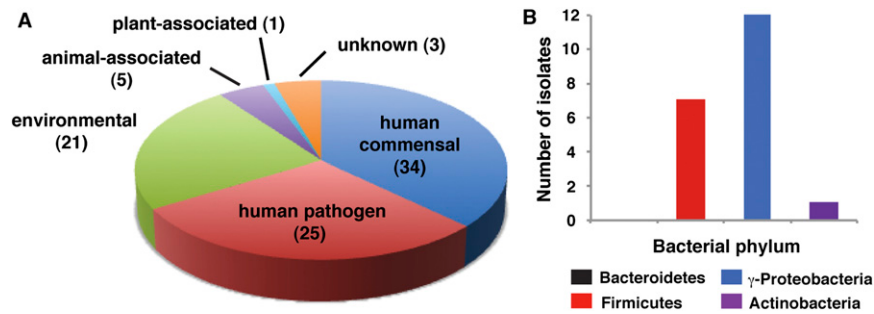

**Fig. S3.** Environmental and phylogenetic distribution of choline utilization. (A) Sources of sequenced bacterial isolates that possess a complete *cut* gene cluster. (B) Phylogenetic distribution of putative choline-degrading human gastrointestinal tract isolates.

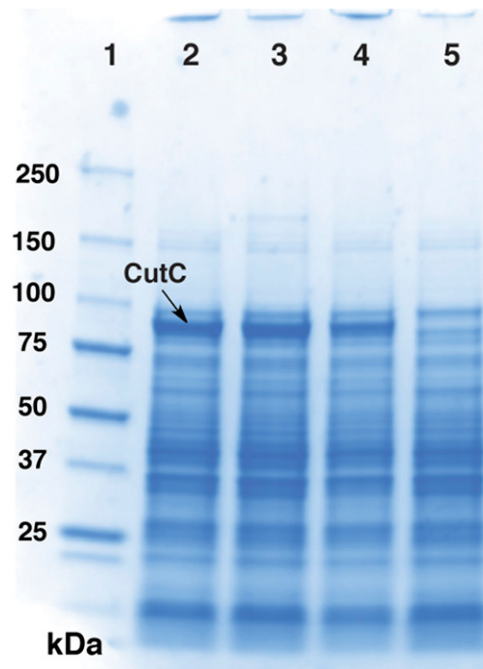

**Fig. S4.** SDS-PAGE of cell lysates from heterologous expressions of CutC and CutD in *E. coli* using a 4–15% (wt/vol) polyacrylamide Tris-HCl gel. Lane 1, 10–250 kDa protein ladder (New England Biolabs); lane 2, wild-type CutC + CutD; lane 3, CutC C498A mutant + CutD; lane 4, CutC G821A mutant + CutD; and lane 5, empty pET-29b vector control. The calculated molecular weight of CutC (Dde\_3282) is 96 kDa.

| Gene                  | GenBank accession no.<br>(protein sequence) | Size (bp/aa) | Homolog in Eut operon<br>(% amino acid ID/similarity) | Putative function                        |
|-----------------------|---------------------------------------------|--------------|-------------------------------------------------------|------------------------------------------|
| <i>cutA</i> Ddes_1355 | ACL49257                                    | 597/188      | EutM (51/73)<br>EutK (37/62)                          | Microcompartment structural protein      |
| <i>cutB</i> Ddes_1356 | ACL49258                                    | 1475/492     | EutE (29/48)                                          | CoA acylating aldehyde dehydrogenase     |
| <i>cutC</i> Ddes_1357 | ACL49259                                    | 2574/848     | None                                                  | Glycyl radical enzyme                    |
| <i>cutD</i> Ddes_1358 | ACL49260                                    | 933/310      | None                                                  | Glycyl radical enzyme activating protein |
| <i>cutE</i> Ddes_1359 | ACL49261                                    | 609/202      | EutM (50/67)<br>EutK (48/68)                          | Microcompartment structural protein      |
| <i>cutF</i> Ddes_1360 | ACL49262                                    | 1578/525     | EutE (32/50)                                          | CoA acylating aldehyde dehydrogenase     |
| <i>cutG</i> Ddes_1361 | ACL49263                                    | 288/99       | EutM (71/83)<br>EutK (47/71)                          | Microcompartment structural protein      |
| <i>cutH</i> Ddes_1362 | ACL49264                                    | 684/227      | None                                                  | Propanediol utilization protein          |
| <i>cutI</i> Ddes_1363 | ACL49265                                    | 822/273      | EutJ (43/62)                                          | Putative chaperonin                      |
| <i>cutJ</i> Ddes_1364 | ACL49266                                    | 639/212      | None                                                  | Propanediol utilization protein          |
| <i>cutK</i> Ddes_1365 | ACL49267                                    | 288/99       | EutN (38/61)                                          | Microcompartment structural protein      |
| <i>cutL</i> Ddes_1366 | ACL49268                                    | 549/182      | EutM (40/57)<br>EutK (41/60)                          | Microcompartment structural protein      |
| <i>cutM</i> Ddes_1367 | ACL49269                                    | 336/111      | None                                                  | Propanediol utilization protein          |
| <i>cutN</i> Ddes_1368 | ACL49270                                    | 285/94       | EutM (71/84)                                          | Microcompartment structural protein      |
| <i>cutO</i> Ddes_1369 | ACL49271                                    | 1107/368     | EutG (36/51)                                          | Alcohol dehydrogenase                    |
| <i>cutP</i> Ddes_1370 | ACL49272                                    | 1326/441     | None                                                  | NADH dehydrogenase                       |
| <i>cutQ</i> Ddes_1371 | ACL49273                                    | 552/183      | EutM (35/58)                                          | Microcompartment structural protein      |
| <i>cutR</i> Ddes_1372 | ACL49274                                    | 348/115      | EutS (52/72)<br>EutM (34/57)                          | Microcompartment structural protein      |
| <i>cutS</i> Ddes_1373 | ACL49275                                    | 435/144      | EutP (34/52)                                          | Ethanolamine utilization protein         |



Table S2. Cont.

| Organism                                                                                          | Gene encoding choline<br>TMA-lyase | GenBank accession<br>no. (protein<br>sequence) | Homology to<br>Ddes_1357 (%<br>amino acid ID/<br>similarity) | Source of isolate                                                                                           |
|---------------------------------------------------------------------------------------------------|------------------------------------|------------------------------------------------|--------------------------------------------------------------|-------------------------------------------------------------------------------------------------------------|
| <i>Clostridium botulinum</i> E3 str.<br>Alaska E43                                                | CLH_1376                           | ACD51097                                       | 77/89                                                        | Salmon eggs associated with a food-borne case<br>of botulism in Alaska                                      |
| <i>Alkaliphilus metalliredigens</i><br>QYMF                                                       | Amet_3836                          | ABR49953                                       | 77/89                                                        | Borax leachate ponds                                                                                        |
| <i>Alkaliphilus oremlandii</i><br>OhILAs                                                          | Clos_2398                          | ABW19930                                       | 77/90                                                        | Anoxic sediments from the Ohio River,<br>Pennsylvania                                                       |
| <i>Anaerococcus hydrogenalis</i><br>DSM 7454*                                                     | ANHYDRO_00917                      | EEB36265                                       | 75/87                                                        | Human feces                                                                                                 |
| <i>Anaerococcus hydrogenalis</i><br>ACS-025-V-Sch4*                                               | HMPREF9246_1434                    | EGC83561                                       | 75/87                                                        | Human vaginal cavity                                                                                        |
| <i>Anaerococcus vaginalis</i> ATCC<br>51170*                                                      | HMPREF0078_1374                    | EEU12078                                       | 75/87                                                        | Human vaginal discharge                                                                                     |
| <i>Anaerococcus tetradius</i> ATCC<br>35098*                                                      | HMPREF0077_1337                    | EEI82584                                       | 75/87                                                        | Human vaginal flora, associated with bacterial<br>vaginosis (BV)                                            |
| <i>Collinsella tanakaei</i> YIT<br>12063*                                                         | HMPREF9452_00749                   | EGX67047                                       | 74/87                                                        | Human feces                                                                                                 |
| <i>Olsenella uli</i> DSM 7084*                                                                    | Olsu_0306                          | ADK67430                                       | 72/87                                                        | Plaque from human gingival crevices                                                                         |
| <i>Olsenella</i> sp. oral taxon 809<br>str. F0356*                                                | HMPREF1008_01171                   | EHF01547                                       | 72/86                                                        | Oral cavity                                                                                                 |
| <i>Streptococcus dysgalactiae</i><br>subsp. <i>equisimilis</i> GGS_118 (AB479807.1:24102.0.26648) | complement                         | BAI63325                                       | 71/84                                                        | Clinical isolate, toxic shock syndrome                                                                      |
| <i>Streptococcus dysgalactiae</i><br>subsp. <i>equisimilis</i> SK1249*                            | HMPREF9964_1417                    | EGL49759                                       | 71/84                                                        | Oral cavity                                                                                                 |
| <i>Streptococcus dysgalactiae</i><br>subsp. <i>equisimilis</i> ATCC<br>12394                      | SDE12394_10005                     | ADX25417                                       | 71/84                                                        | Bovine udder infection                                                                                      |
| <i>Paenibacillus dendritiformis</i><br>C454                                                       | PDENDC454_17188                    | EHQ61018                                       | 71/84                                                        | —                                                                                                           |
| <i>Clostridium asparagiforme</i><br>DSM 15981*                                                    | CLOSTASPAR_04587                   | EEG53372                                       | 83/93                                                        | Human feces                                                                                                 |
| <i>Desulfotomaculum reducens</i><br>MI-1                                                          | Dred_3278                          | ABO51778                                       | 65/81                                                        | Heavy-metal-contaminated sediment collected at<br>the Mare Island Naval Shipyard on San Francisco<br>Bay    |
| <i>Desulfosporosinus meridiei</i><br>DSM 13257                                                    | DesmerDRAFT_0460                   | EHC17003                                       | 63/80                                                        | Groundwater contaminated with aromatic<br>compounds from motor fuel in sandy soil from<br>Western Australia |
| <i>Desulfotomaculum ruminis</i><br>DSM 2154                                                       | Desru_2090                         | AEG60342                                       | 64/80                                                        | Rumen of hay-fed sheep                                                                                      |
| <i>Desulfosporosinus youngiae</i><br>DSM 17734                                                    | DesyoDRAFT_5132                    | EHQ92066                                       | 63/80                                                        | Constructed wetland sediment, South Carolina                                                                |
| <i>Desulfosporosinus orientis</i><br>DSM 765                                                      | Desor_5421                         | AET70797                                       | 63/80                                                        | Soil at pumping station near rising main Rangoon<br>Road, Singapore                                         |
| <i>Desulfitobacterium</i><br><i>hafniense</i> DP7*                                                | HMPREF0322_04110                   | EHL05181                                       | 64/79                                                        | Human feces                                                                                                 |
| <i>Desulfitobacterium</i><br><i>dehalogenans</i> ATCC 51507                                       | DesdeDRAFT_0645                    | EHP61312                                       | 64/79                                                        | Sediment in freshwater pond, Athens, Georgia                                                                |
| <i>Desulfitobacterium</i><br><i>hafniense</i> DCB-2                                               | Dhaf_4905                          | ACL22899                                       | 64/79                                                        | Municipal sludge, Denmark                                                                                   |
| <i>Desulfosporosinus</i> sp. OT                                                                   | DOT_2444                           | EGW39601                                       | 63/79                                                        | Sediment in the Norilsk hydrometallurgy tailings<br>dam                                                     |
| <i>Desulfitobacterium</i><br><i>hafniense</i> Y51                                                 | DSY5006                            | BAE86795                                       | 65/80                                                        | Soil contaminated with tetrachloroethene in<br>Japan                                                        |
| <i>Klebsiella oxytoca</i> 10-5245*                                                                | HMPREF9689_00016                   | EHT04374                                       | 65/80                                                        | Human urine                                                                                                 |
| <i>Klebsiella</i> sp. MS 92-3*                                                                    | HMPREF9538_05494                   | EGF60105                                       | 62/78                                                        | Human feces                                                                                                 |
| <i>Klebsiella pneumoniae</i> 342                                                                  | KPK_4883                           | ACI10981                                       | 62/78                                                        | Interior of nitrogen-efficient maize plants                                                                 |
| <i>Klebsiella oxytoca</i> 10-5250*                                                                | HMPREF9694_03855                   | EHT07921                                       | 65/80                                                        | Urogenital tract                                                                                            |
| <i>Klebsiella variicola</i> At-22                                                                 | Kvar_4520                          | ADC60394                                       | 62/78                                                        | <i>Atta cephalotes</i> fungus garden                                                                        |

Table S2. Cont.

| Organism                                                                      | Gene encoding choline<br>TMA-lyase | GenBank accession<br>no. (protein<br>sequence) | Homology to<br>Ddes_1357 (%<br>amino acid ID/<br>similarity) | Source of isolate                                                                                 |
|-------------------------------------------------------------------------------|------------------------------------|------------------------------------------------|--------------------------------------------------------------|---------------------------------------------------------------------------------------------------|
| <i>Klebsiella pneumoniae</i> subsp.<br><i>rhinoscleromatis</i> ATCC<br>13884* | HMPREF0484_5138                    | EEW38822                                       | 62/78                                                        | Human airways sample, nose of patient in<br>Sumatra                                               |
| <i>Enterobacter aerogenes</i><br>KCTC 2190                                    | EAE_10070                          | AEG96930                                       | 64/80                                                        | Human pathogen, airways                                                                           |
| <i>Klebsiella oxytoca</i> 10-5242*                                            | HMPREF9686_04809                   | EHS90956                                       | 64/80                                                        | Human bone                                                                                        |
| <i>Klebsiella oxytoca</i> 10-5243*                                            | HMPREF9687_04958                   | EHS89002                                       | 64/79                                                        | Human blood                                                                                       |
| <i>Klebsiella oxytoca</i> KCTC 1686                                           | KOX_09770                          | AEX03680                                       | 64/80                                                        | —                                                                                                 |
| <i>Escherichia fergusonii</i><br>ECD227                                       | ECD227_1338                        | EGC95100                                       | 64/79                                                        | Broiler chicken                                                                                   |
| <i>Escherichia fergusonii</i> B253                                            | ERIG_01261                         | EGC08120                                       | 64/79                                                        | —                                                                                                 |
| <i>Klebsiella oxytoca</i> 10-5246*                                            | HMPREF9690_00446                   | EHT14116                                       | 65/80                                                        | Human blood                                                                                       |
| <i>Vibrio furnissii</i> NCTC 11218                                            | vfu_A00327                         | ADT85554                                       | 62/78                                                        | Estuarine water, UK; causes gastroenteritis,<br>zoonotic disease                                  |
| <i>Escherichia fergusonii</i> ATCC<br>35469*                                  | EFER_1995                          | CAQ89502                                       | 65/80                                                        | Human feces of 1-y-old boy                                                                        |
| <i>Aeromonas hydrophila</i><br>subsp. <i>hydrophila</i> ATCC<br>7966          | AHA_1330                           | ABK39643                                       | 65/81                                                        | Canned milk from US; food poisoning,<br>gastroenteritis, septicemia                               |
| <i>Escherichia coli</i> O7:K1 str.<br>CE10                                    | CE10_4248                          | AEQ14949                                       | 65/80                                                        | Cerebrospinal fluid of a neonate with meningitis,<br>US                                           |
| <i>Escherichia coli</i> F11                                                   | EcF11_0690                         | EDV68614                                       | 65/80                                                        | 20-y-old woman presenting her first case of cystitis<br>with bacteriuria                          |
| <i>Escherichia coli</i> UM146                                                 | UM146_22045                        | ADN73733                                       | 65/80                                                        | Ileum of a patient with Crohn disease                                                             |
| <i>Escherichia coli</i> AA86                                                  | ECAA86_03971                       | EGH36471                                       | 65/80                                                        | Feces of healthy cow                                                                              |
| <i>Escherichia coli</i> IAI39                                                 | ECIAI39_4211                       | CAR20318                                       | 65/80                                                        | Patient with pyelonephritis                                                                       |
| <i>Escherichia coli</i> MS 69-1*                                              | HMPREF9534_02377                   | EFJ81575                                       | 65/80                                                        | Human feces                                                                                       |
| <i>Escherichia coli</i> UTI89*                                                | UTI89_C4964                        | ABE10367                                       | 65/80                                                        | Woman with uncomplicated cystitis                                                                 |
| <i>Escherichia coli</i> 536                                                   | ECP_4600                           | ABG72536                                       | 65/80                                                        | Patient with acute pyelonephritis                                                                 |
| <i>Escherichia coli</i> MS 200-1*                                             | HMPREF9553_01535                   | EFJ62362                                       | 65/80                                                        | Human feces                                                                                       |
| <i>Escherichia coli</i> MS 153-1*                                             | HMPREF9544_00990                   | EFU53892                                       | 65/80                                                        | Human feces                                                                                       |
| <i>Escherichia coli</i> MS 60-1*                                              | HMPREF9533_00811                   | EGB84333                                       | 65/80                                                        | Human feces                                                                                       |
| <i>Proteus mirabilis</i> HI4320                                               | PMI2716                            | CAR45338                                       | 61/78                                                        | Pathogen, urine of a nursing home patient with<br>a long-term (>30 d) indwelling urinary catheter |
| <i>Proteus mirabilis</i> ATCC<br>29906*                                       | HMPREF0693_2863                    | EEI47333                                       | 61/78                                                        | Urogenital tract                                                                                  |
| <i>Providencia alcalifaciens</i> DSM<br>30120*                                | PROVALCAL_01555                    | EEB46441                                       | 63/79                                                        | Human feces                                                                                       |
| <i>Providencia rustigianii</i> DSM<br>4541*                                   | PROVRUST_06324                     | EFB72255                                       | 63/79                                                        | Human feces                                                                                       |
| <i>Providencia rettgeri</i> DSM<br>1131*                                      | PROVRETT_07161                     | EFE54165                                       | 63/79                                                        | Human feces                                                                                       |
| <i>Yokenella regensburgei</i><br>ATCC 43003*                                  | HMPREF0880_04646                   | EHM44496                                       | 61/77                                                        | Human feces collected in New Jersey                                                               |
| <i>Proteus penneri</i> ATCC 35198*                                            | PROPEN_00404                       | EEG87333                                       | 62/79                                                        | Human feces, Texas                                                                                |

**Table S3. Annotation of cut gene cluster in *Desulfovibrio alaskensis* G20**

| Gene                 | GenBank accession no.<br>(protein sequence) | Size, bp/aa | Homolog in <i>D. desulfuricans</i> ATCC 27774<br>(% amino acid ID/similarity) | Putative function                        |
|----------------------|---------------------------------------------|-------------|-------------------------------------------------------------------------------|------------------------------------------|
| <i>cutA</i> Dde_3284 | ABB40078                                    | 624/208     | Ddes_1355 (75/85)                                                             | Microcompartment structural protein      |
| <i>cutB</i> Dde_3283 | ABB40077                                    | 1506/502    | Ddes_1356 (61/72)                                                             | CoA acylating aldehyde dehydrogenase     |
| <i>cutC</i> Dde_3282 | ABB40076                                    | 2538/846    | Ddes_1357 (83/91)                                                             | Glycyl radical enzyme                    |
| <i>cutD</i> Dde_3281 | ABB40075                                    | 933/310     | Ddes_1358 (62/76)                                                             | Glycyl radical enzyme activating protein |
| <i>cutE</i> Dde_3280 | ABB40074                                    | 621/207     | Ddes_1359 (43/60)                                                             | Microcompartment structural protein      |
| <i>cutF</i> Dde_3279 | ABB40073                                    | 1458/486    | Ddes_1360 (71/82)                                                             | Acetaldehyde dehydrogenase               |
| <i>cutG</i> Dde_3278 | ABB40072                                    | 282/94      | Ddes_1361 (95/96)                                                             | Microcompartment structural protein      |
| <i>cutH</i> Dde_3276 | ABB40070                                    | 702/234     | Ddes_1362 (65/78)                                                             | Propanediol utilization protein          |
| <i>cutI</i> Dde_3275 | ABB40069                                    | 822/273     | Ddes_1363 (71/83)                                                             | Putative chaperonin                      |
| <i>cutJ</i> Dde_3274 | ABB40068                                    | 591/197     | Ddes_1364 (43/58)                                                             | Propanediol utilization protein          |
| <i>cutK</i> Dde_3273 | ABB40067                                    | 273/91      | Ddes_1365 (70/81)                                                             | Microcompartment structural protein      |
| <i>cutL</i> Dde_3272 | ABB40066                                    | 549/182     | Ddes_1366 (57/72)                                                             | Microcompartment structural protein      |
| <i>cutM</i> Dde_3271 | ABB40065                                    | 348/116     | Ddes_1367 (41/53)                                                             | Propanediol utilization protein          |
| <i>cutN</i> Dde_3270 | ABB40064                                    | 276/92      | Ddes_1368 (90/94)                                                             | Microcompartment structural protein      |
| <i>cutO</i> Dde_3267 | ABB40061                                    | 1110/369    | Ddes_1369 (66/79)                                                             | Alcohol dehydrogenase                    |
| <i>cutP</i> Dde_3266 | ABB40060                                    | 1329/442    | Ddes_1370 (67/81)                                                             | NADH dehydrogenase                       |
| <i>cutQ</i> Dde_3265 | ABB40059                                    | 552/183     | Ddes_1371 (67/83)                                                             | Microcompartment structural protein      |
| <i>cutR</i> Dde_3264 | ABB40058                                    | 357/119     | Ddes_1372 (74/88)                                                             | Microcompartment structural protein      |
| <i>cutS</i> Dde_3263 | ABB40057                                    | 420/140     | Ddes_1373 (55/71)                                                             | Ethanolamine utilization protein         |

**Table S4. Glycyl radical enzyme amino acid sequences used in CutC phylogenetic analysis**

| Gene or locus tag | Organism                                                               | GenBank accession no.<br>(protein sequence) | Annotation                           |
|-------------------|------------------------------------------------------------------------|---------------------------------------------|--------------------------------------|
| Ddes_1357         | <i>Desulfovibrio desulfuricans</i> ATCC 27774                          | ABB40078                                    | Choline TMA-lyase                    |
| Dde_3282          | <i>Desulfovibrio alaskensis</i> G20                                    | ABB40076                                    | Choline TMA-lyase                    |
| CLOSTHATH_02755   | <i>Clostridium hathewayi</i> DSM 13479                                 | EFC99034                                    | Choline TMA-lyase                    |
| CLOSP0_02864      | <i>Clostridium sporogenes</i> ATCC 15579                               | EDU36695                                    | Choline TMA-lyase                    |
| CTC_01449         | <i>Clostridium tetani</i> E88                                          | AAO36007                                    | Choline TMA-lyase                    |
| HMPREF0078_1374   | <i>Anaerococcus vaginalis</i> ATCC 51170                               | EEU12078                                    | Choline TMA-lyase                    |
| HMPREF9553_01535  | <i>Escherichia coli</i> MS 200-1                                       | EFJ62362                                    | Choline TMA-lyase                    |
| HMPREF0484_5138   | <i>Klebsiella pneumoniae</i> subsp. <i>rhinoscleromatis</i> ATCC 13884 | EEW38822                                    | Choline TMA-lyase                    |
| HMPREF0693_2863   | <i>Proteus mirabilis</i> ATCC 29906                                    | EEI47333                                    | Choline TMA-lyase                    |
| PROPEN_00404      | <i>Proteus penneri</i> ATCC 35198                                      | EEG87333                                    | Choline TMA-lyase                    |
| <i>dhaB1</i>      | <i>Clostridium butyricum</i>                                           | AAM54728                                    | Glycerol dehydratase                 |
| <i>pflB1</i>      | <i>Clostridium ljungdahlii</i> DSM 13528                               | ADK14251                                    | Glycerol dehydratase                 |
| NT01CX_1220       | <i>Clostridium novyi</i> NT                                            | ABK60580                                    | Glycerol dehydratase                 |
| CbC4_0337         | <i>Clostridium botulinum</i> BKT015925                                 | AEB75017                                    | Glycerol dehydratase                 |
| <i>tutD</i>       | <i>Thauera aromatica</i>                                               | AAC38454                                    | Benzylsuccinate synthase             |
| <i>bssA</i>       | <i>Azoarcus</i> sp. T                                                  | AAK50372                                    | Benzylsuccinate synthase             |
| Geob_2448         | <i>Geobacter</i> sp. FRC-32                                            | ACM20801                                    | Benzylsuccinate synthase             |
| <i>bssA</i>       | <i>Aromatoleum aromaticum</i> EbN1                                     | CAI07159                                    | Benzylsuccinate synthase             |
| <i>csdB</i>       | <i>Clostridium scatologenes</i>                                        | ABB05046                                    | 4-Hydroxyphenylacetate decarboxylase |
| CLH_1872          | <i>Clostridium botulinum</i> E3 str. Alaska E43                        | ACD52546                                    | 4-Hydroxyphenylacetate decarboxylase |
| CLL_A1723         | <i>Clostridium botulinum</i> B str. Eklund 17B                         | ACD24941                                    | 4-Hydroxyphenylacetate decarboxylase |
| <i>hpdB</i>       | <i>Clostridium difficile</i> ATCC 9689                                 | CAD65889                                    | 4-Hydroxyphenylacetate decarboxylase |
| <i>pflB</i>       | <i>Escherichia coli</i> str. K-12 substr. MG1655                       | AAC73989                                    | Pyruvate formate-lyase               |
| SARI_01990        | <i>Salmonella enterica</i> subsp. <i>arizonae</i>                      | ABX21870                                    | Pyruvate formate-lyase               |
| <i>pflB</i>       | <i>Klebsiella pneumoniae</i> subsp. <i>pneumoniae</i> MGH 78578        | ABR76367                                    | Pyruvate formate-lyase               |
| <i>pfl1</i>       | <i>Photorhabdus luminescens</i> subsp. <i>laumondii</i> TTO1           | CAY33841                                    | Pyruvate formate-lyase               |
| CGSHiGG_03495     | <i>Haemophilus influenzae</i> PittGG                                   | ABQ99687                                    | Pyruvate formate-lyase               |
| VIBHAR_01546      | <i>Vibrio harveyi</i> ATCC BAA-1116                                    | ABU70516                                    | Pyruvate formate-lyase               |
| <i>pflB</i>       | <i>Clostridium butyricum</i> 5521                                      | EDT76498                                    | Pyruvate formate-lyase               |

**Table S5. Primers used for cloning and site directed mutagenesis**

| Oligo                | Sequence                                  | Restriction site |
|----------------------|-------------------------------------------|------------------|
| Dde-3282-NdeI-start  | 5' GCATCATATGGATCTCCAGGACTTTTCACATAAGC 3' | NdeI             |
| Dde-3282-XhoI-nostop | 5' GATTCTCGAGGAAACCATGCAGCATGG 3'         | XhoI             |
| Dde-3281-NdeI-start  | 5' GCATCATATGAGAACCGCAACACACAGAGACG 3'    | NdeI             |
| Dde-3281-XhoI-stop   | 5' GATTCTCGAGTCAGTGGCGGATCACCGAAACC 3'    | XhoI             |
| Dde3282-QC-C489A-for | 5' GACTACTGCCTGATGGGTGCCGTGGAACCGCAG 3'   | —                |
| Dde3282-QC-C489A-rev | 5' CTGCGGTTCCACGGCACCCATCAGGCAGTAGTC 3'   | —                |
| Dde3282-QC-G821A-for | 5' GTGGTGCGCGTGGCCGCATACAGCGCCTTCTTC 3'   | —                |
| Dde3282-QC-G821A-rev | 5' GAAGAAGGCGCTGTATGCGGCCACGCGCACCCAC 3'  | —                |
